# Supplementary figures and images for: Prolactin Rescues Immature B-Cells from Apoptosis Induced by B-Cell Receptor Cross-Linking
Source: Hindawi journal article supplement (doi:10.1155/2016/3219017), 2016-01-01

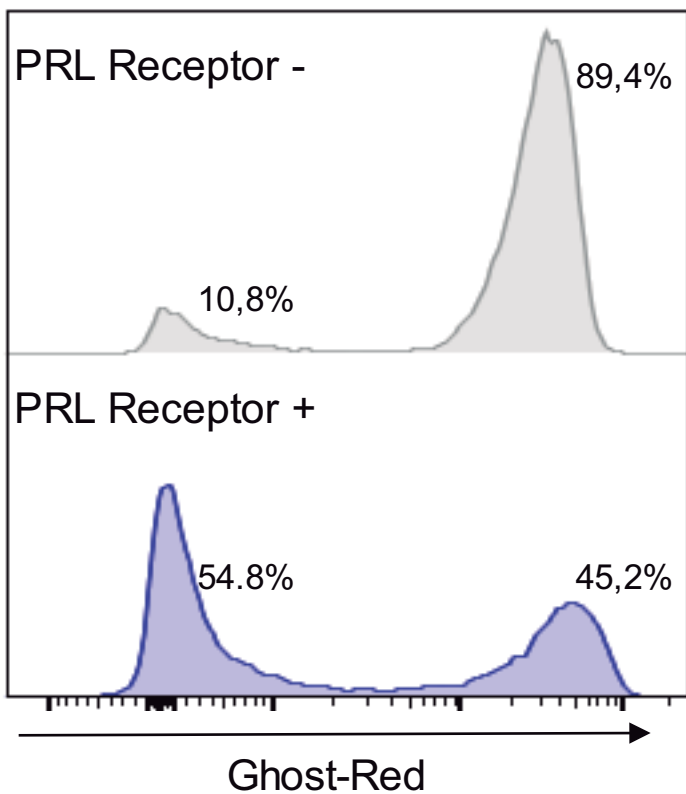

Supplement: f1 [file 3219017.f1.zip]

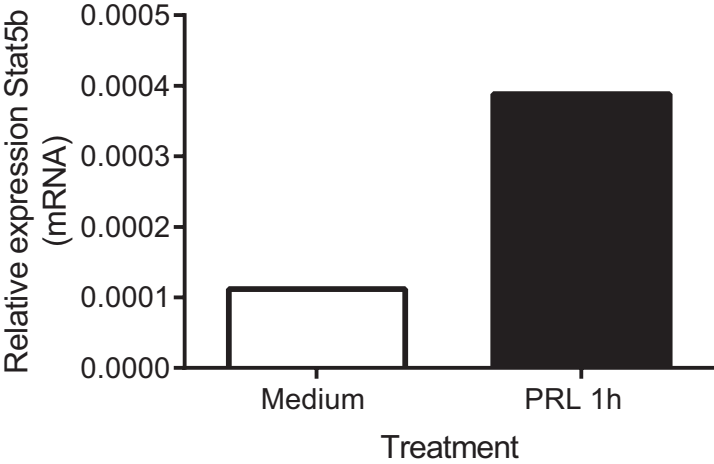

Supplement: f1 [file 3219017.f1.zip]

Pre-Sort

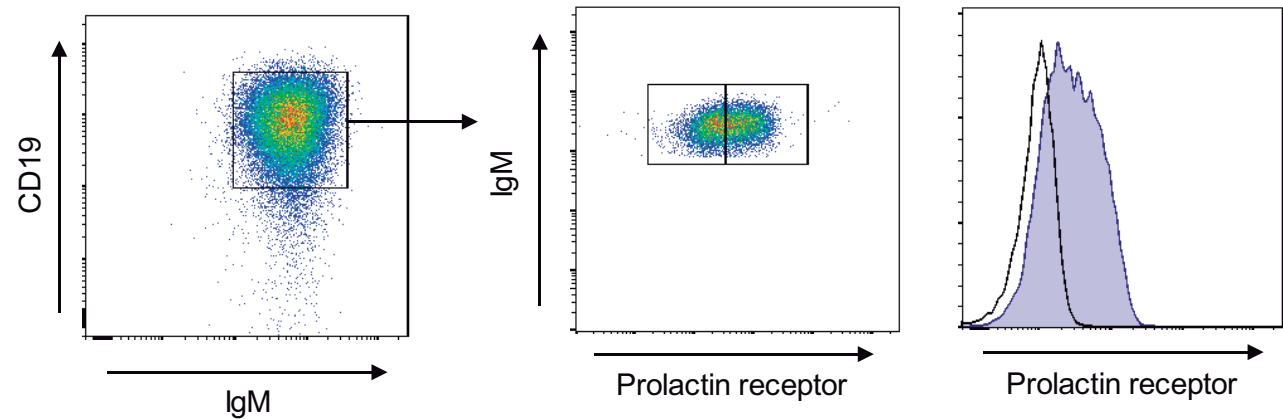

Post-sort

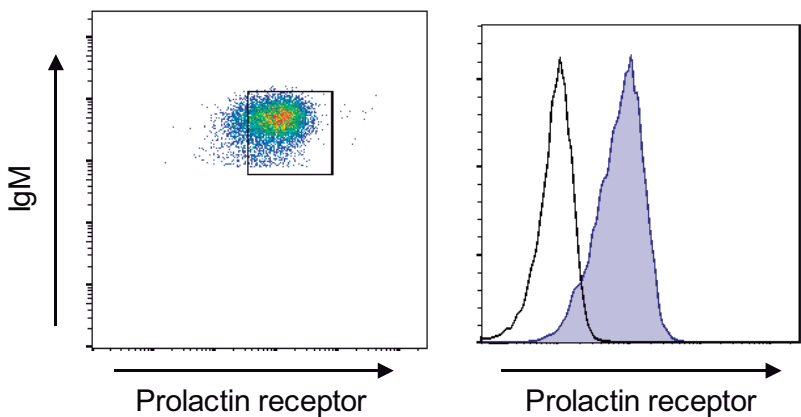

Supplement: f1 [file 3219017.f1.zip]

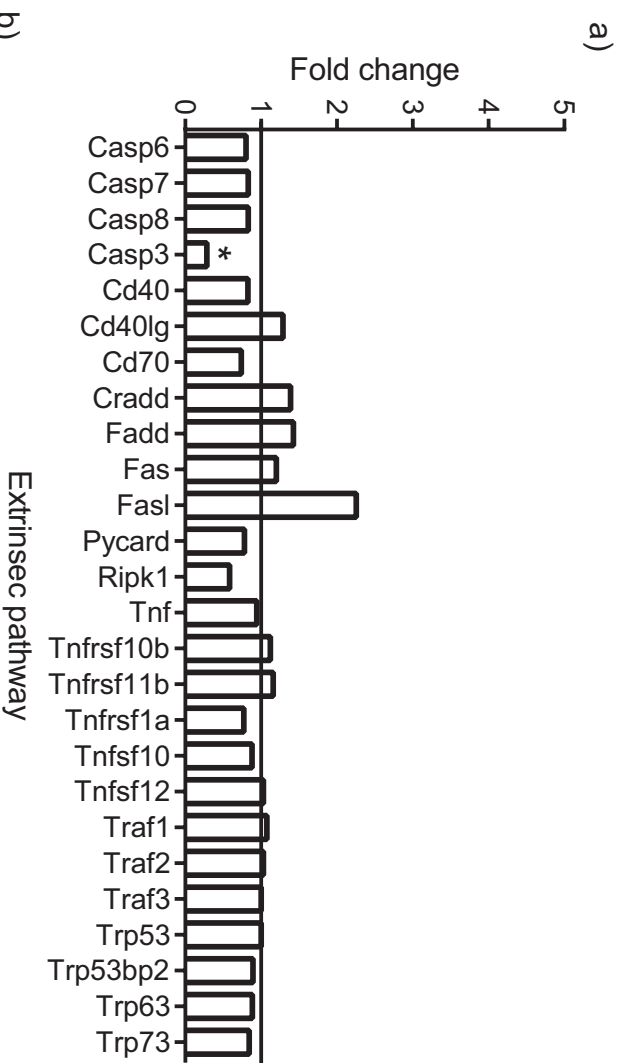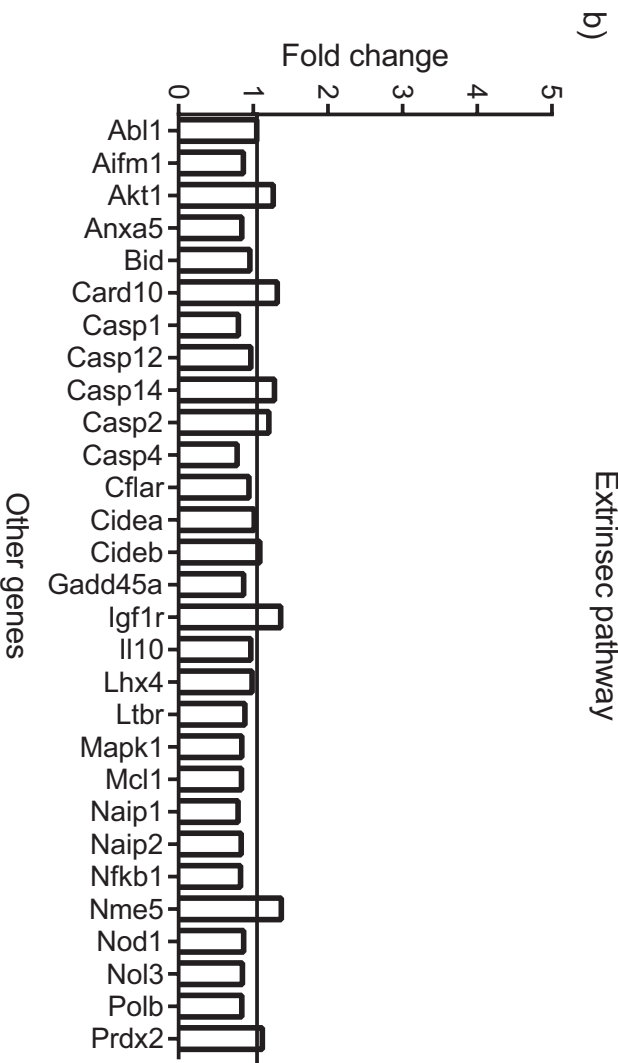

Supplement: f1 [file 3219017.f1.zip]
